# Supplementary figures and images for: Synaptic representation of locomotion in single cerebellar granule cells
Source: eLife journal article supplement (doi:10.7554/elife.07290), 2015-06-17

A

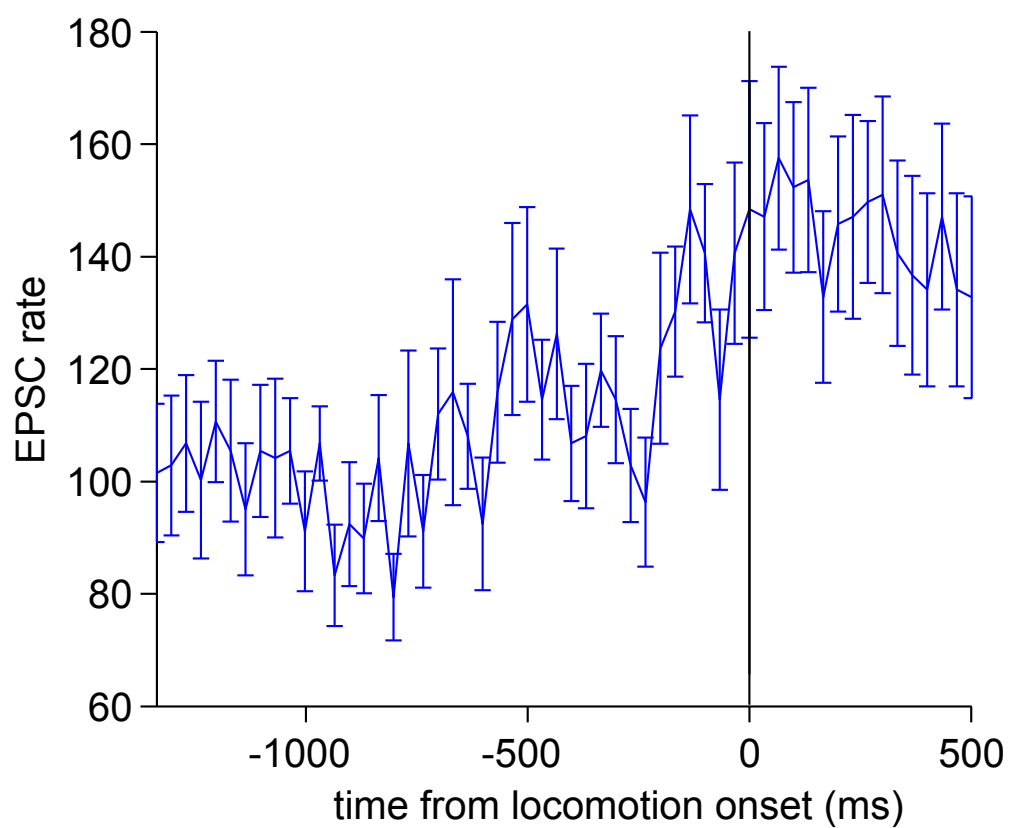

B

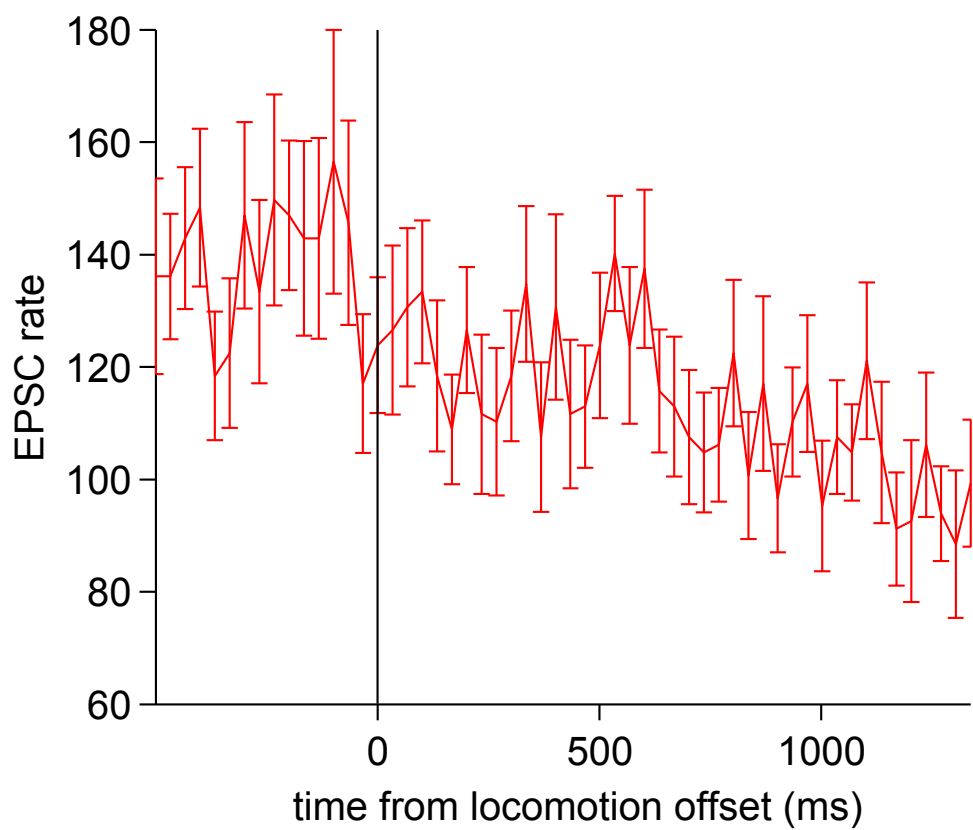

Supplement: supp [file elife-07290-supp-v1.zip]

A

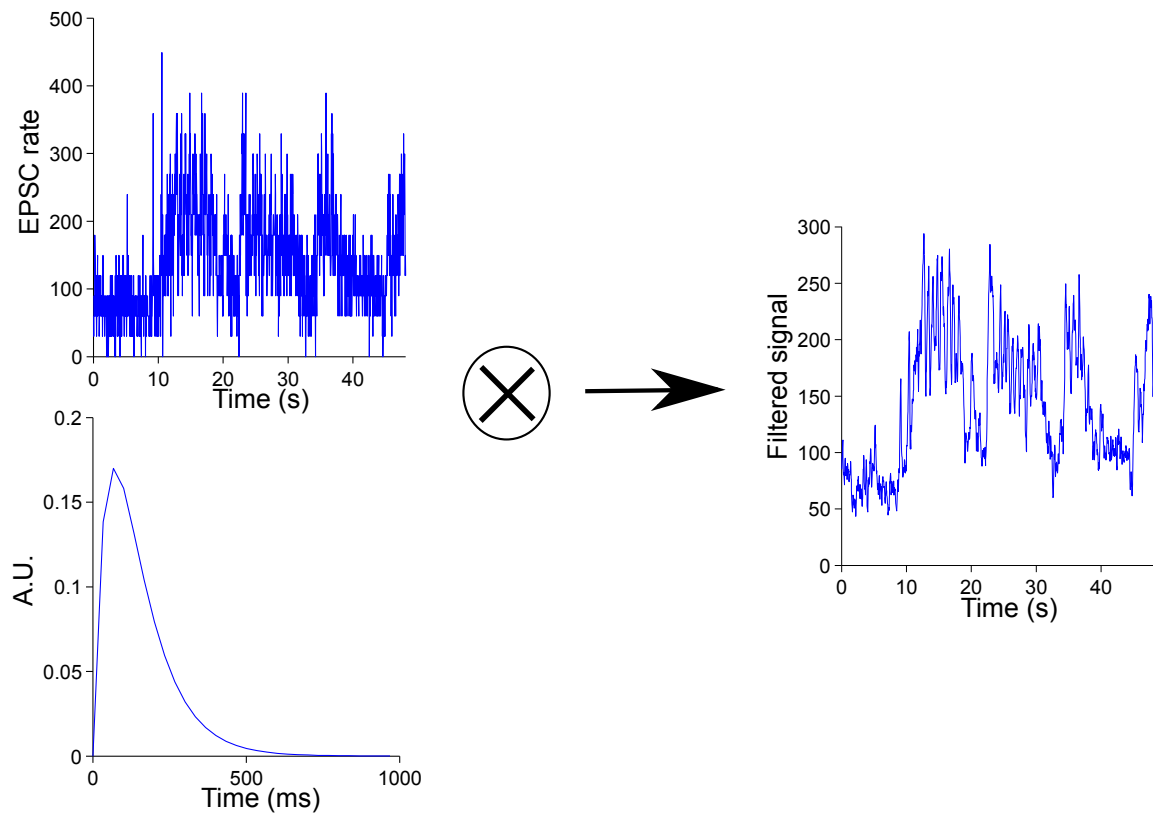

B

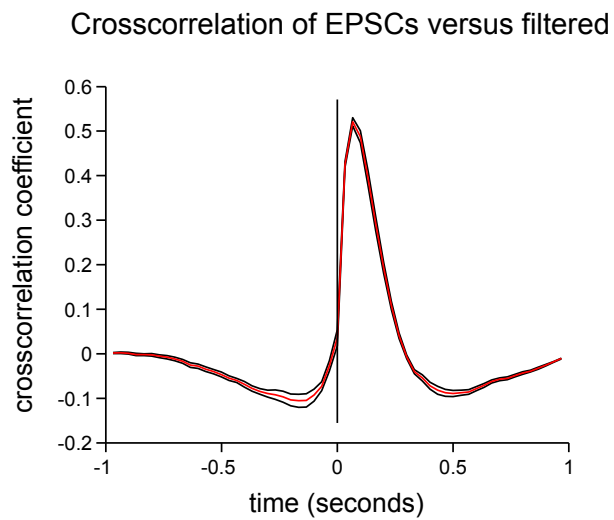

C

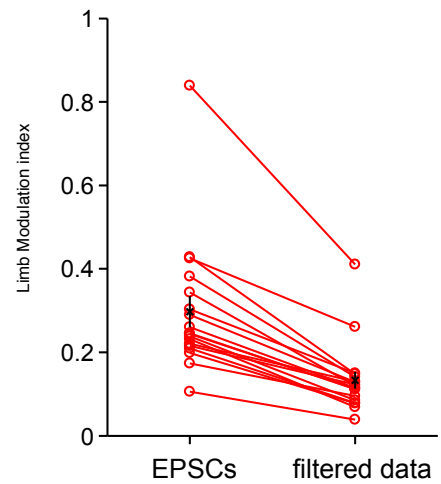

Supplement: supp [file elife-07290-supp-v1.zip]

A

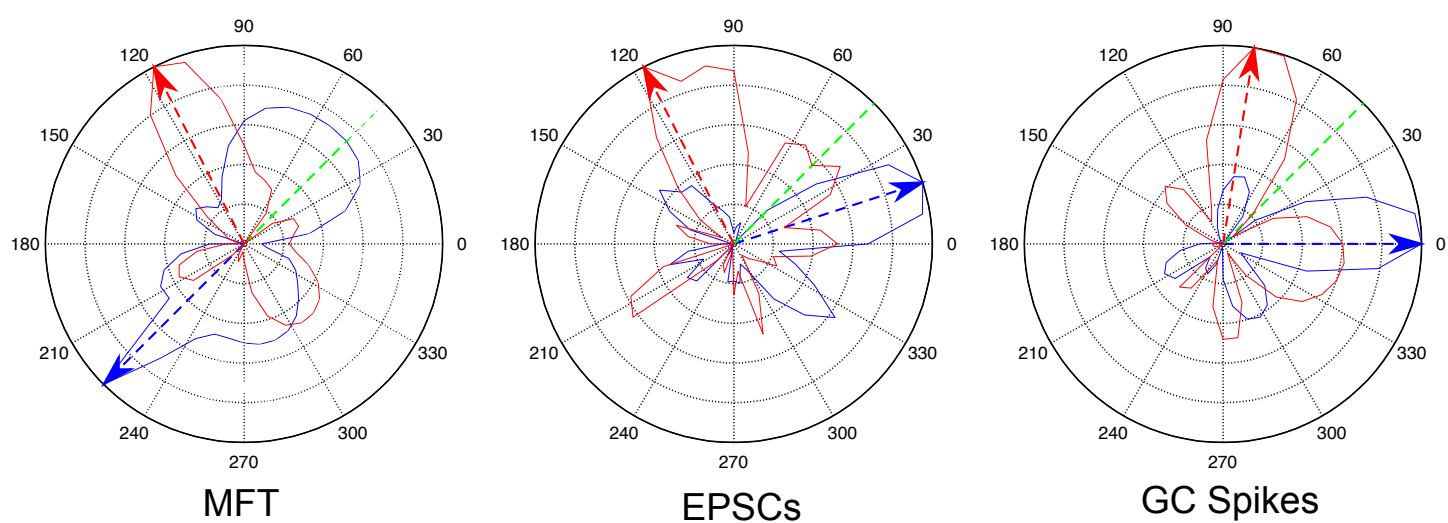

B

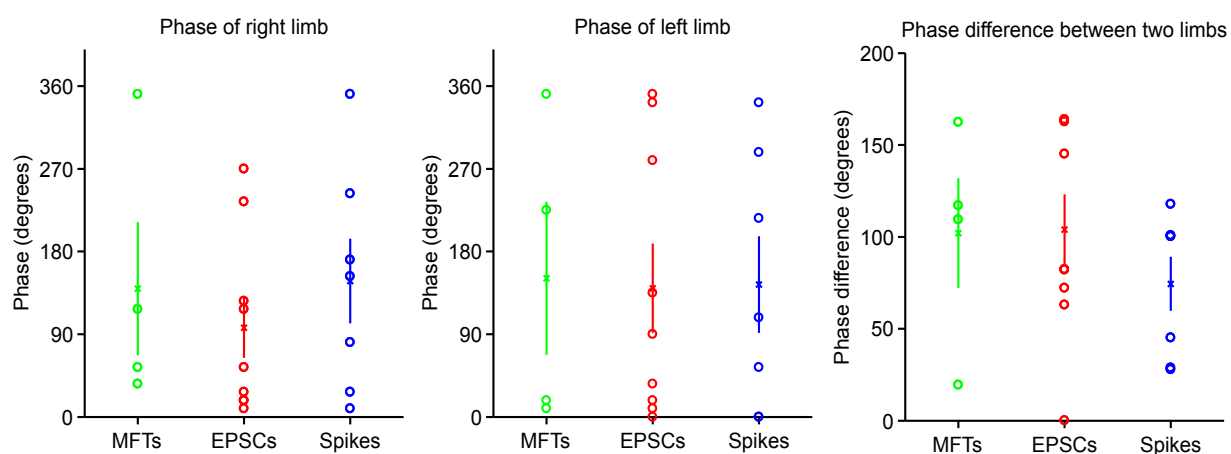

C

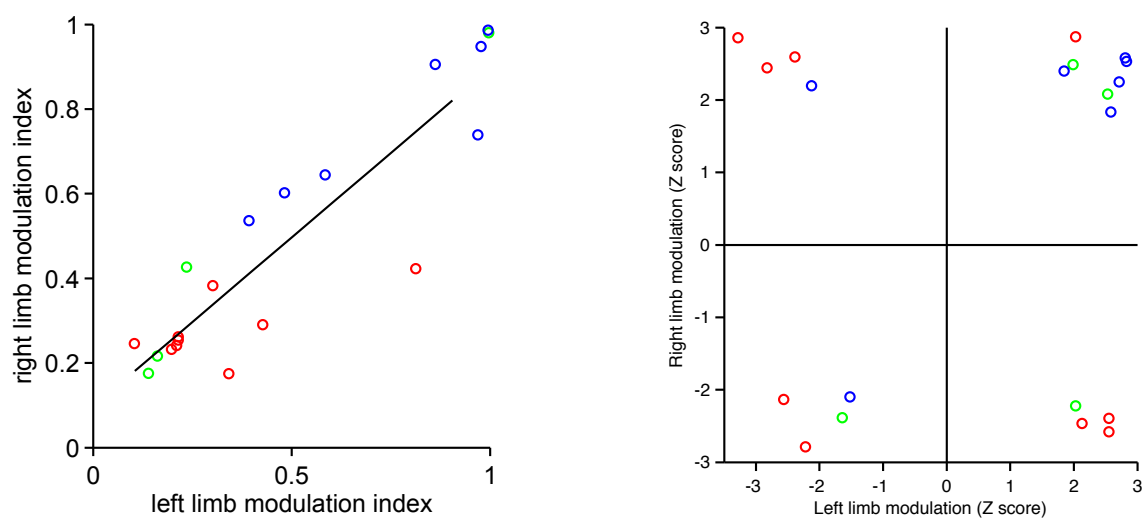

Supplement: supp [file elife-07290-supp-v1.zip]

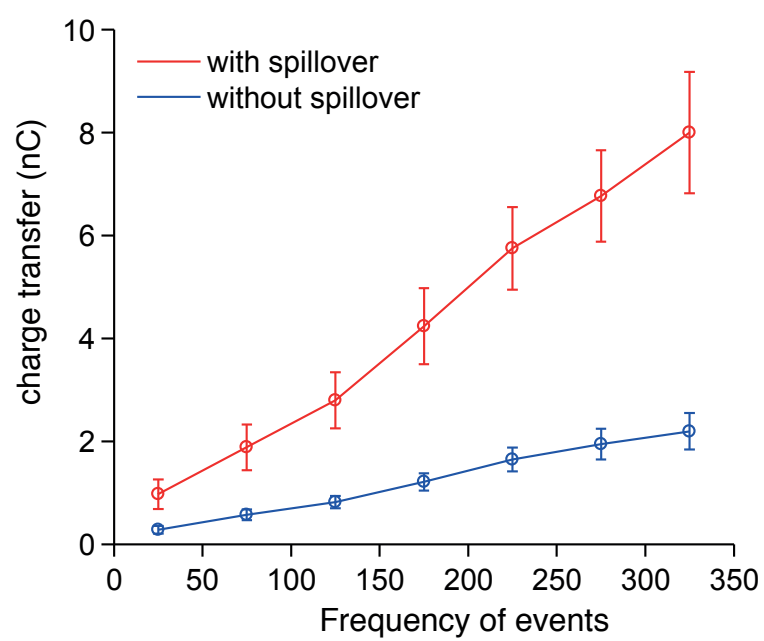

Supplement: supp [file elife-07290-supp-v1.zip]
